# Supplementary material for: Elevated expression of prostate cancer-associated genes is linked to down-regulation of microRNAs
Source: PubMed Central journal article supplement (PMC3923006; doi:10.1186/1471-2407-14-82), 2014-02-11
Supplement: 1471-2407-14-82-S1.pdf [file 1471-2407-14-82-S1.pdf]

**Figure S1: Heat map based on the relative expression of genes and miRNAs in human prostate tissue.** Columns represent genes and miRNAs; rows represent prostate tissue samples (red squares: Tu samples, green squares: Tf samples, yellow squares: BPH samples). Transcript levels of genes and miRNAs were normalized to TBP and RNU48, respectively.

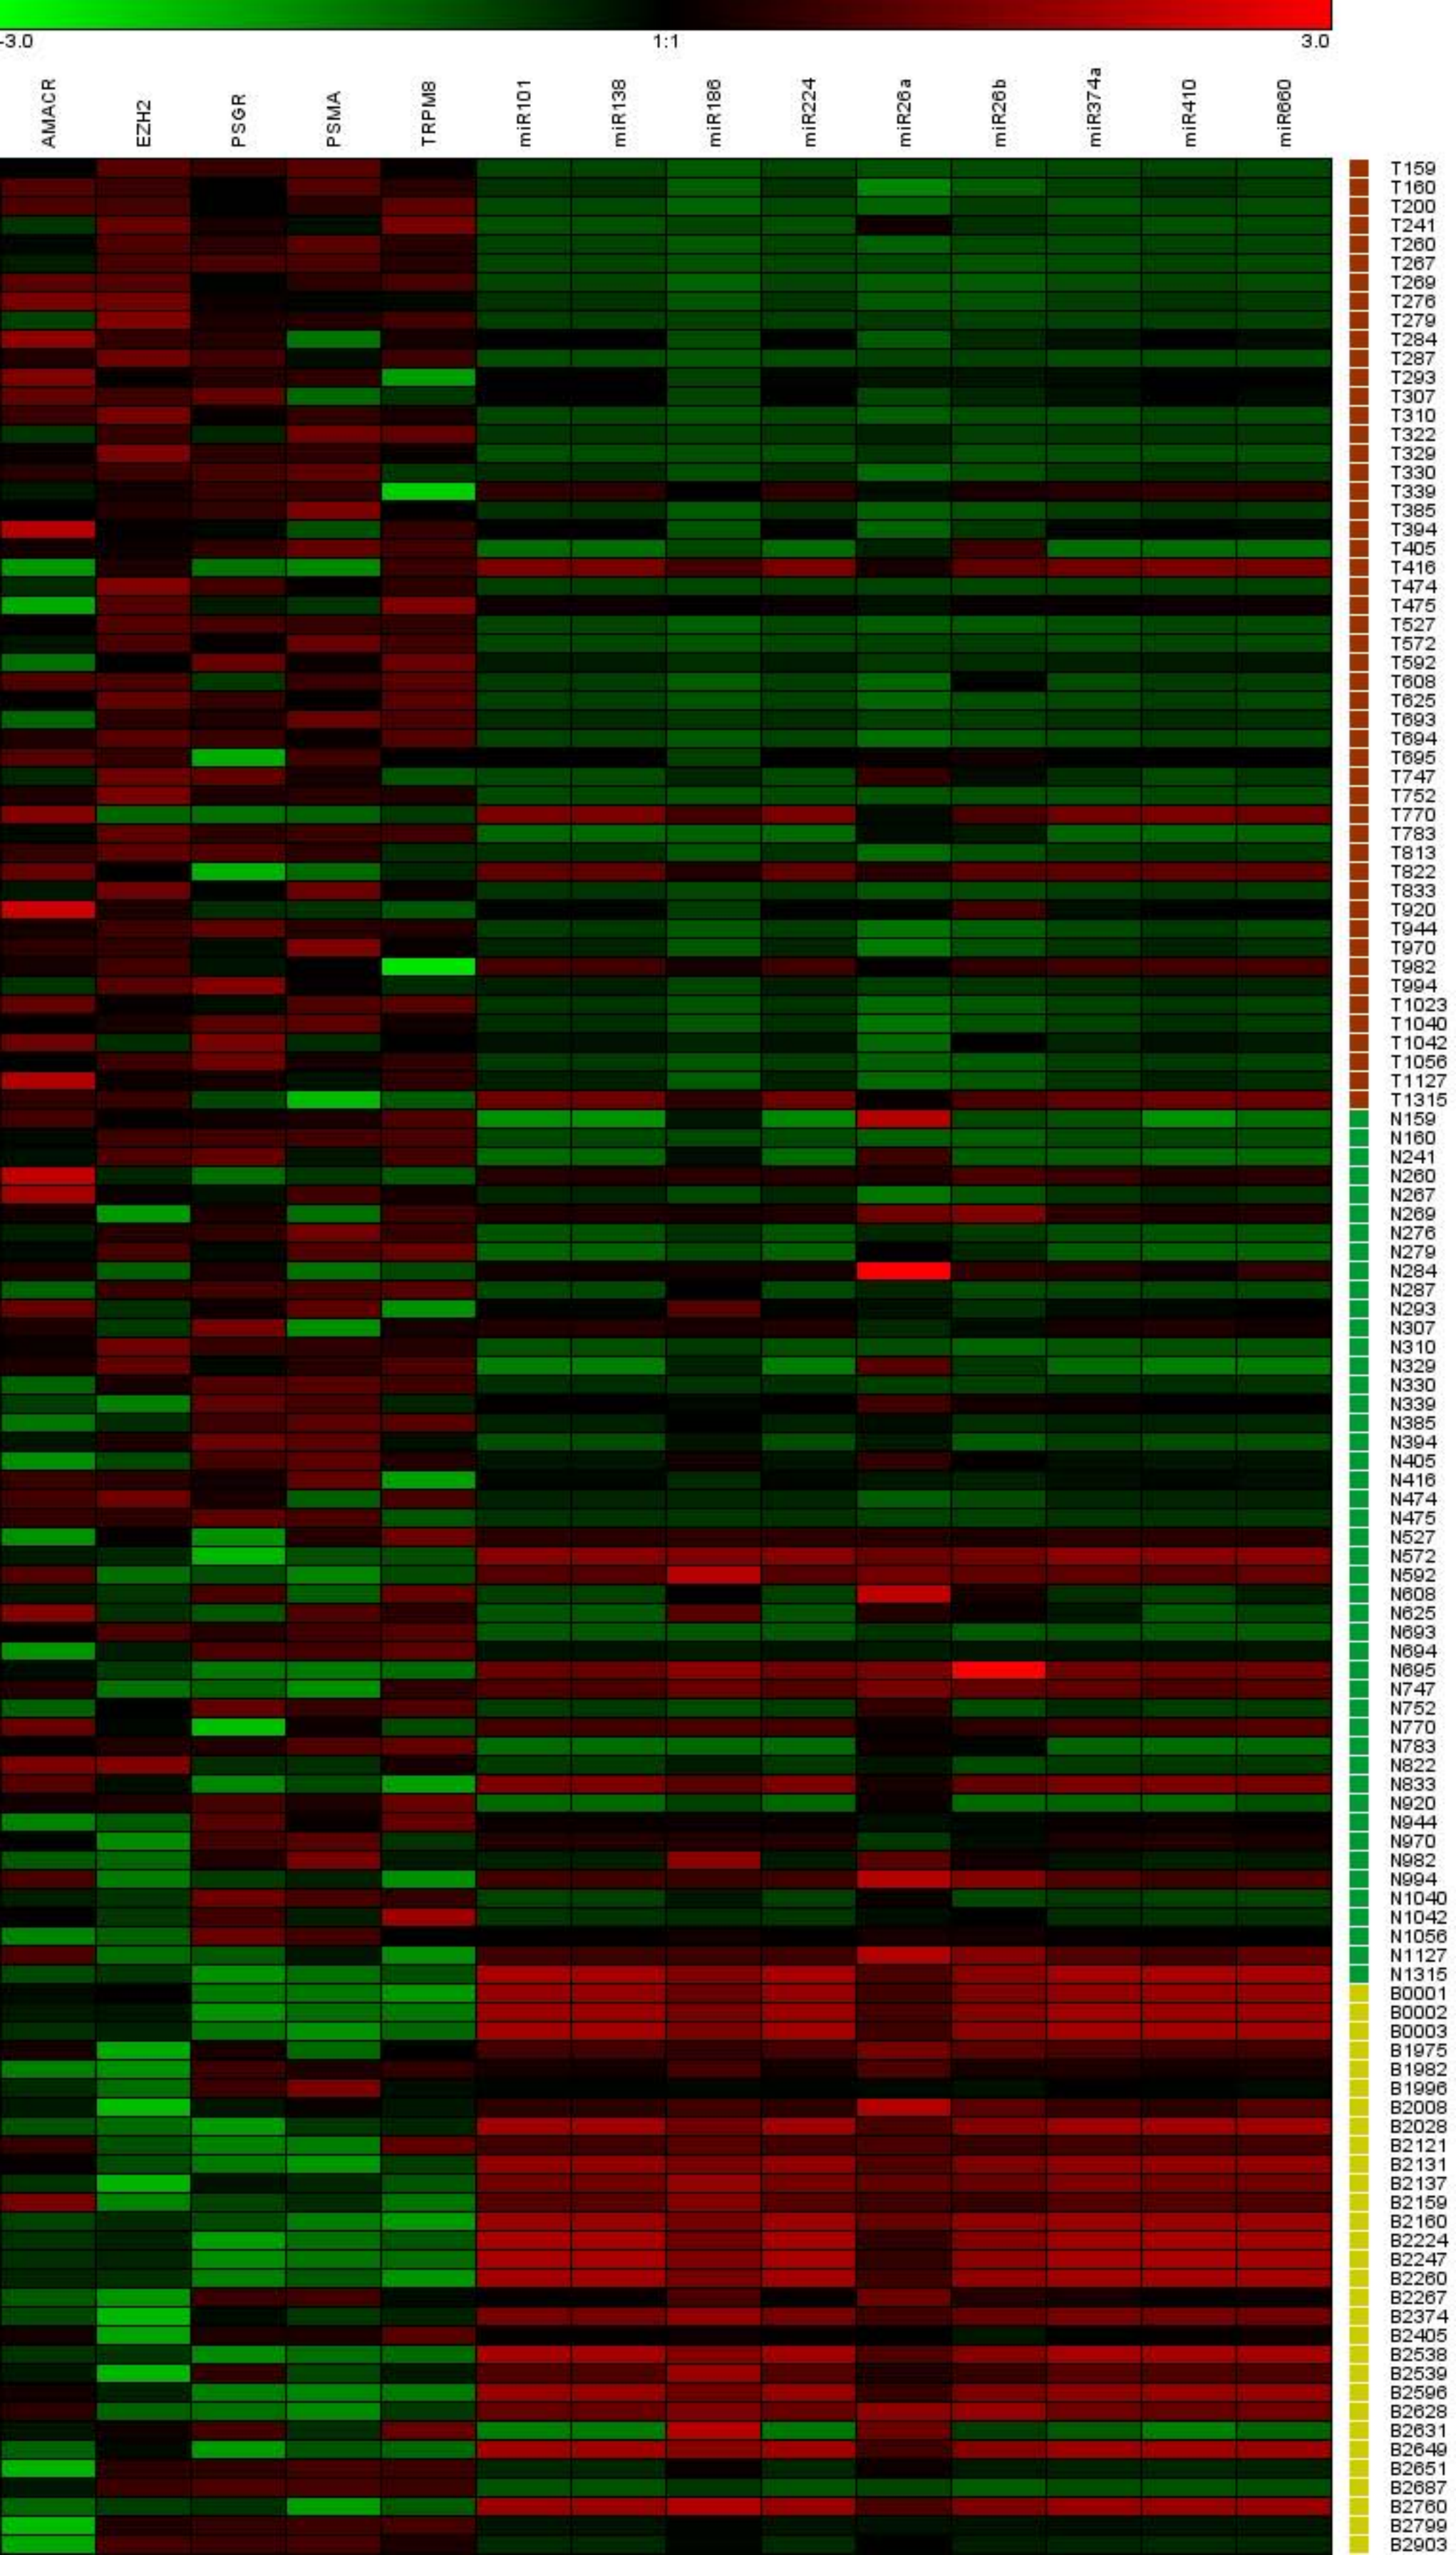

**Table S1: Web addresses of the bioinformatics resources used for miRNA prediction.**

| <b>Bioinformatic resource</b>                                        | <b>Web address</b>                                                                                                                        |
|----------------------------------------------------------------------|-------------------------------------------------------------------------------------------------------------------------------------------|
| TargetScanHuman v5.1                                                 | <a href="http://www.targetscan.org/">http://www.targetscan.org/</a>                                                                       |
| TargetScanS                                                          | <a href="http://genes.mit.edu/tscan/targetscanS2005.html">http://genes.mit.edu/tscan/targetscanS2005.html</a>                             |
| PicTar<br>(based on conservation in mammals)                         | <a href="http://pictar.mdc-berlin.de/">http://pictar.mdc-berlin.de/</a>                                                                   |
| MicroCosm Targets<br>(formerly miRBase Targets)                      | <a href="http://www.ebi.ac.uk/enright-srv/microcosm/htdocs/targets/v5/">http://www.ebi.ac.uk/enright-srv/microcosm/htdocs/targets/v5/</a> |
| microRNA.org                                                         | <a href="http://www.microrna.org/microrna/home.do">http://www.microrna.org/microrna/home.do</a>                                           |
| Human miRNA Targets<br>(optimized intersection: PicTar, TargetScanS) | <a href="http://www.diana.pcbi.upenn.edu/cgi-bin/TargetCombo.cgi">http://www.diana.pcbi.upenn.edu/cgi-bin/TargetCombo.cgi</a>             |
| DIANA microT v3.0                                                    | <a href="http://diana.cslab.ece.ntua.gr/microT/">http://diana.cslab.ece.ntua.gr/microT/</a>                                               |
| DIANA TarBase v5.0                                                   | <a href="http://diana.cslab.ece.ntua.gr/tarbase/">http://diana.cslab.ece.ntua.gr/tarbase/</a>                                             |

**Table S2: Sequences of primers and probes used for qPCR.**

| Gene name (synonym)                                                                                 | Abbreviation (synonym)   | Gene ID <sup>a</sup> | Primer / Probe                                 | Sequence 5'-3'                                                                                                                    | Length of qPCR fragment | Ref.  |
|-----------------------------------------------------------------------------------------------------|--------------------------|----------------------|------------------------------------------------|-----------------------------------------------------------------------------------------------------------------------------------|-------------------------|-------|
| alpha-methylacyl-CoA racemase                                                                       | <b>AMACR</b>             | 23600                | AMACR FOR<br>AMACR REV<br>AMACR FL<br>AMACR LC | gTATgCCCCgCTgAATCTC<br>TCCTTTgATCAgCAgCTCgTAg<br>ATgCTgTTCCTTCCACCATATTTgCATC-FL<br>LC640-ATgACCTgACCCTTgCCAgTgCgT-PH             | 312 bp                  |       |
| enhancer of zeste homolog 2                                                                         | <b>EZH2</b>              | 2146                 | EZH2 FOR<br>EZH2 REV<br>EZH2 FL<br>EZH2 LC     | gCCAgACTgggAAgAAATCTg<br>TgTgTTggAAAATCCAAgTCA<br>AACCTCTTgAgCTgTCTCagTCgCA-FL<br>LC640-TACTCTgATTTTACACgCTTCCgCC-PH              | 277 bp                  | [1]   |
| prostate-specific G-protein coupled receptor (olfactory receptor, family 51, subfamily E, member 2) | <b>PSGR</b><br>(OR51E2)  | 81285                | PSGR FOR<br>PSGR REV<br>PSGR FL<br>PSGR LC     | AACTgCTgTATgggCTCTACTg<br>TgCCACTACATACATggAAAaggAgg<br>TCCAgCTATgAgTTCCTgCAACTTCACAC-FL<br>LC640-TgCCACCTTTgTgCTTATTggTATCCCA-PH | 179 bp                  |       |
| prostate-specific membrane antigen (folate hydrolase 1)                                             | <b>PSMA</b><br>(FOLH1)   | 2346                 | PSMA FOR<br>PSMA REV<br>PSMA FL<br>PSMA LC     | CTTCTCCTCggCTTCCTCTTC<br>gATTTTCATgTCCCGTTCCA<br>TTCCACTgggATTgAATTTgCTTTgC-FL<br>LC640-AgCTgAAAgTTTTgTTCTgTTCCCTgCTAAATg-PH      | 485 bp                  |       |
| TATA box binding protein                                                                            | <b>TBP</b>               | 6908                 | TBP FOR<br>TBP REV<br>TBP FL<br>TBP LC         | gAATATAATCCCAAgCggTTTg<br>ACTTCACATCACAgCTCCCC<br>TTTCCCgAACTgAAAATCAgTgCC-FL<br>LC640-TggTTCgTggCTCTCTTATCCTCATg-PH              | 226 bp                  | [1]   |
| transient receptor potential cation channel, subfamily M, member 8                                  | <b>TRPM8</b><br>(Trp-p8) | 79054                | TRPM8 FOR<br>TRPM8 REV<br>TRPM8 FL<br>TRPM8 LC | ACgCTTgTgTACCggAATCT<br>CgAgTAATAggAgACACgTCg<br>TTTCCAgACAAACgTgAggAgggC-FL<br>LC640-CATTATAggAATTCTTggCgATCTgCA-PH              | 167 bp                  | [1-3] |

<sup>a</sup> <http://www.ncbi.nlm.nih.gov/gene>

FL, fluorescence dye fluorescein; FOR, forward primer; LC640, fluorescence dye LC Red640; PH, phosphorylated 3'-end; REV, reverse primer

- Schmidt U, Fuessel S, Koch R, Baretton GB, Lohse A, Tomasetti S, Unversucht S, Froehner M, Wirth MP, Meye A: **Quantitative multi-gene expression profiling of primary prostate cancer.** *Prostate* 2006, **66**(14):1521-1534.
- Fuessel S, Sickert D, Meye A, Klenk U, Schmidt U, Schmitz M, Rost AK, Weigle B, Kiessling A, Wirth MP: **Multiple tumor marker analyses (PSA, hK2, PSCA, trp-p8) in primary prostate cancers using quantitative RT-PCR.** *Int J Oncol* 2003, **23**(1):221-228.
- Kiessling A, Fussel S, Schmitz M, Stevanovic S, Meye A, Weigle B, Klenk U, Wirth MP, Rieber EP: **Identification of an HLA-A\*0201-restricted T-cell epitope derived from the prostate cancer-associated protein trp-p8.** *Prostate* 2003, **56**(4):270-279.

**Table S3: Conditions for qPCR measurements.**

|                                  | <b>AMACR</b> | <b>EZH2</b>     | <b>PSGR</b>      | <b>PSMA</b>     | <b>TBP</b>      | <b>TRPM8</b> | <b>miRNAs</b>                     |
|----------------------------------|--------------|-----------------|------------------|-----------------|-----------------|--------------|-----------------------------------|
| <b>MgCl<sub>2</sub></b>          | 4 mM         | 4 mM            | 4 mM             | 4 mM            | 4 mM            | 4 mM         | TaqMan Gene Expression Master Mix |
| <b>Primer</b> (for / rev)        | 0.5 μM each  | 0.5 μM each     | 0.5 μM / 0.25 μM | 0.25 μM each    | 0.3 μM / 0.6 μM | 0.5 μM each  | Specific TaqMan                   |
| <b>Probes</b> (FL / LC)          | 0.2 μM each  | 0.2 μM / 0.4 μM | 0.2 μM each      | 0.2 μM / 0.4 μM | 0.2 μM / 0.4 μM | 0.2 μM each  | MicroRNA Assays                   |
| <b>Activation</b> (1 cycle)      | 95°C, 10 min | 95°C, 10 min    | 95°C, 10 min     | 95°C, 10 min    | 95°C, 10 min    | 95°C, 10 min | 95°C, 10 min                      |
| <b>Amplification</b> (45 cycles) |              |                 |                  |                 |                 |              |                                   |
| <b>Denaturation step</b>         | 95°C, 10 s   | 95°C, 1 s       | 95°C, 1 s        | 95°C, 10 s      | 95°C, 10 s      | 95°C, 10 s   | 95°C, 15 s                        |
| <b>Annealing step</b>            | 59°C, 10 s   | 60°C, 15 s      | 59°C, 10 s       | 59°C, 15 s      | 61°C, 15 s      | 66°C, 15 s   | 60°C, 60 s                        |
| <b>Elongation step</b>           | 72°C, 10 s   | 72°C, 20 s      | 72°C, 10 s       | 72°C, 20 s      | 72°C, 10 s      | 72°C, 10 s   | -                                 |

FL, probe with fluorescence dye fluorescein; for, forward primer; LC, probe with fluorescence dye LC Red640; rev, reverse primer

**Table S4: Distributions of fold expressions of PCa-associated genes and miRNAs in prostate cancer.** Depicted are the proportions of fold expression in Tu samples compared to either Tf or BPH samples. A fold expression of  $\geq 2.0$  was considered as up-regulation and of  $\leq -2.0$  as down-regulation, whereas the remaining proportion was regarded as an unaltered expression.

| Gene / miRNA | Fold expressions: Tu vs Tf <sub>[median]</sub> |                    |                              | Fold expressions: Tu vs BPH <sub>[median]</sub> |                    |                              |
|--------------|------------------------------------------------|--------------------|------------------------------|-------------------------------------------------|--------------------|------------------------------|
|              | $\leq -2.0$ -fold down<br>n (%)                | unaltered<br>n (%) | $\geq 2.0$ -fold up<br>n (%) | $\leq -2.0$ -fold down<br>n (%)                 | unaltered<br>n (%) | $\geq 2.0$ -fold up<br>n (%) |
| AMACR        | 5 (10%)                                        | 5 (10%)            | 40 (80%)                     | 2 (4%)                                          | 4 (8%)             | 44 (88%)                     |
| EZH2         | 1 (2%)                                         | 29 (58%)           | 20 (40%)                     | 0 (0%)                                          | 10 (20%)           | 40 (80%)                     |
| PSGR         | 9 (18%)                                        | 12 (24%)           | 29 (58%)                     | 3 (6%)                                          | 2 (4%)             | 45 (90%)                     |
| PSMA         | 8 (16%)                                        | 14 (28%)           | 28 (56%)                     | 2 (4%)                                          | 5 (10%)            | 43 (86%)                     |
| TRPM8        | 5 (10%)                                        | 15 (30%)           | 30 (60%)                     | 2 (4%)                                          | 5 (10%)            | 43 (86%)                     |
| miR-101      | 22 (44%)                                       | 25 (50%)           | 3 (6%)                       | 13 (26%)                                        | 32 (64%)           | 5 (10%)                      |
| miR-138      | 36 (72%)                                       | 12 (24%)           | 2 (4%)                       | 36 (72%)                                        | 11 (22%)           | 3 (6%)                       |
| miR-186      | 43 (86%)                                       | 7 (14%)            | 0 (0%)                       | 45 (90%)                                        | 5 (10%)            | 0 (0%)                       |
| miR-224      | 36 (72%)                                       | 14 (28%)           | 0 (0%)                       | 34 (68%)                                        | 14 (28%)           | 2 (4%)                       |
| miR-26a      | 27 (54%)                                       | 23 (46%)           | 0 (0%)                       | 22 (44%)                                        | 26 (52%)           | 2 (4%)                       |
| miR-26b      | 16 (32%)                                       | 29 (58%)           | 5 (10%)                      | 12 (24%)                                        | 30 (60%)           | 8 (16%)                      |
| miR-374a     | 28 (56%)                                       | 21 (42%)           | 1 (2%)                       | 23 (46%)                                        | 26 (52%)           | 1 (2%)                       |
| miR-410      | 35 (70%)                                       | 14 (28%)           | 1 (2%)                       | 38 (76%)                                        | 11 (22%)           | 1 (2%)                       |
| miR-660      | 19 (38%)                                       | 30 (60%)           | 1 (2%)                       | 20 (40%)                                        | 29 (58%)           | 1 (2%)                       |

**Table S5: Expression of selected genes in prostate cancer dependent on clinicopathological parameters.** Depicted are the median relative transcript levels of the evaluated genes (normalized to TBP) in Tu tissue samples. A Mann–Whitney *U* test with a two-sided 95% confidence interval was used for two group comparisons. Three-group comparisons were carried out by the Kruskal–Wallis test followed by a Mann–Whitney *U* test with a two-sided 95% confidence interval for *post hoc* analyses. Significant differences are highlighted in bold.

| Parameter                 | AMACR                                          | EZH2      | PSGR      | PSMA      | TRPM8            |
|---------------------------|------------------------------------------------|-----------|-----------|-----------|------------------|
|                           | P values and median relative transcript levels |           |           |           |                  |
| <b>Age</b>                | p = 0.635                                      | p = 0.778 | p = 0.114 | p = 0.869 | p = 0.165        |
| ≤ median (n=25)           | 2228.90                                        | 0.99      | 67.79     | 29.56     | 52.31            |
| > median (n=25)           | 1771.34                                        | 0.90      | 25.02     | 15.76     | 31.18            |
| <b>PSA</b>                | p = 0.705                                      | p = 0.705 | p = 0.079 | p = 0.869 | p = 0.308        |
| ≤ median (n=25)           | 2341.57                                        | 0.99      | 67.79     | 16.91     | 31.85            |
| > median (n=25)           | 1935.56                                        | 0.90      | 38.70     | 29.49     | 52.31            |
| <b>Tumor stage</b>        | p = 0.915                                      | p = 0.661 | p = 0.247 | p = 0.676 | <b>p = 0.030</b> |
| pT1+2 (n=23)              | 2341.57                                        | 0.99      | 66.95     | 15.89     | 52.44            |
| pT3+4 (n=27)              | 1935.56                                        | 0.90      | 38.70     | 28.03     | 25.14            |
| <b>Gleason score</b>      | p = 0.706                                      | p = 0.354 | p = 0.128 | p = 0.906 | p = 0.421        |
| < 7 (n=16)                | 2369.88                                        | 0.86      | 65.35     | 25.88     | 38.16            |
| 7 (n=19)                  | 1303.14                                        | 0.99      | 60.30     | 28.01     | 41.13            |
| > 7 (n=15)                | 1771.34                                        | 0.90      | 15.69     | 28.03     | 16.49            |
| <b>Initial metastases</b> | p = 0.225                                      | p = 0.410 | p = 0.160 | p = 0.297 | p = 0.182        |
| N0 M0 (n=40)              | 2339.05                                        | 0.98      | 50.89     | 25.88     | 38.55            |
| N+/M+ (n=10)              | 969.76                                         | 0.84      | 43.31     | 28.02     | 27.56            |



**Table S6: Expression of selected miRNAs in prostate cancer dependent on clinicopathological parameters.** Depicted are the median relative transcript levels of the evaluated miRNAs (normalized to RNU48) in Tu tissue samples. A Mann–Whitney *U* test with a two-sided 95% confidence interval was used for two group comparisons. Three-group comparisons were carried out by the Kruskal–Wallis test followed by a Mann–Whitney *U* test with a two-sided 95% confidence interval for *post hoc* analyses. Significant differences are highlighted in bold.

| Parameter                 | miR-101                                                             | miR-138   | miR-186          | miR-224   | miR-26a   | miR-26b   | miR-374a  | miR-410   | miR-660   |
|---------------------------|---------------------------------------------------------------------|-----------|------------------|-----------|-----------|-----------|-----------|-----------|-----------|
|                           | P values and median relative transcript levels (x10 <sup>-3</sup> ) |           |                  |           |           |           |           |           |           |
| <b>Age</b>                | p = 0.388                                                           | p = 0.643 | p = 0.877        | p = 0.915 | p = 0.299 | p = 0.091 | p = 0.509 | p = 0.090 | p = 0.432 |
| ≤ median (n=25)           | 1.57                                                                | 0.24      | 36.60            | 1.12      | 194.32    | 53.32     | 17.91     | 0.12      | 13.60     |
| > median (n=25)           | 1.47                                                                | 0.15      | 40.49            | 1.27      | 149.10    | 35.59     | 17.24     | 0.00      | 11.87     |
| <b>PSA</b>                | p = 0.662                                                           | p = 0.657 | p = 0.907        | p = 0.432 | p = 0.607 | p = 0.786 | p = 0.218 | p = 0.572 | p = 0.720 |
| ≤ median (n=25)           | 1.56                                                                | 0.24      | 38.43            | 1.38      | 194.32    | 51.32     | 19.88     | 0.00      | 14.84     |
| > median (n=25)           | 1.47                                                                | 0.14      | 40.49            | 0.99      | 165.54    | 52.95     | 16.24     | 0.09      | 13.32     |
| <b>Tumor stage</b>        | p = 0.778                                                           | p = 0.262 | <b>p = 0.028</b> | p = 0.838 | p = 0.459 | p = 0.969 | p = 0.414 | p = 0.635 | p = 0.711 |
| pT1+2 (n=23)              | 1.47                                                                | 0.43      | 47.70            | 1.27      | 149.62    | 51.50     | 20.02     | 0.00      | 11.42     |
| pT3+4 (n=27)              | 1.59                                                                | 0.13      | 33.89            | 1.12      | 194.32    | 52.04     | 16.82     | 0.09      | 13.98     |
| <b>Gleason score</b>      | p = 0.633                                                           | p = 0.866 | p = 0.742        | p = 0.721 | p = 0.752 | p = 0.495 | p = 0.913 | p = 0.914 | p = 0.786 |
| < 7 (n=16)                | 1.48                                                                | 0.39      | 41.37            | 1.43      | 194.66    | 50.70     | 18.36     | 0.11      | 14.92     |
| 7 (n=19)                  | 1.56                                                                | 0.15      | 38.03            | 1.08      | 175.64    | 52.95     | 17.91     | 0.09      | 11.95     |
| > 7 (n=15)                | 1.44                                                                | 0.15      | 40.49            | 0.93      | 149.10    | 51.50     | 17.36     | 0.00      | 13.98     |
| <b>Initial metastases</b> | p = 0.370                                                           | p = 0.480 | <b>p = 0.005</b> | p = 0.369 | p = 0.528 | p = 0.865 | p = 0.913 | p = 0.625 | p = 0.445 |
| N0 M0 (n=40)              | 1.47                                                                | 0.34      | 44.86            | 1.30      | 177.19    | 51.77     | 17.63     | 0.05      | 11.91     |
| N+/M+ (n=10)              | 1.66                                                                | 0.07      | 31.18            | 0.89      | 194.32    | 52.13     | 17.80     | 0.09      | 14.92     |
